# Supplementary material for: Genome-Wide Analysis of Codon Usage Patterns of SARS-CoV-2 Virus Reveals Global Heterogeneity of COVID-19
Source: MDPI journal article supplement (doi:10.3390/biom11060912), 2021-06-18
Supplement: s1 [file s1]

**Supplementary Table S1:** *ENC Values of sixty SARS-CoV-2 Strains around the globe with mean ENC value, Standard deviation and Maximum and minimum ENC value.*

| S. No | Accession Number | Country   | ENC   | S. No     | Accession Number | Country  | ENC   |
|-------|------------------|-----------|-------|-----------|------------------|----------|-------|
| 1     | MT500122.1       | Pakistan  | 45.37 | 31        | MT890210.1       | Ghana    | 45.73 |
| 2     | MT879619.1       | Pakistan  | 45.33 | 32        | MT890211.1       | Ghana    | 47.77 |
| 3     | MT262993.1       | Pakistan  | 45.38 | 33        | MT890230.1       | Ghana    | 47.41 |
| 4     | MT240479.1       | Pakistan  | 45.36 | 34        | MT890235.1       | Ghana    | 45.74 |
| 5     | MT135042.1       | China     | 45.38 | 35        | MT890236.1       | Ghana    | 49.1  |
| 6     | MT135043.1       | China     | 45.37 | 36        | MT499215.1       | Tunisia  | 45.37 |
| 7     | MT121215.1       | China     | 45.17 | 37        | MT499217.1       | Tunisia  | 45.35 |
| 8     | MN996529.1       | China     | 45.36 | 38        | MT499218.1       | Tunisia  | 45.37 |
| 9     | NC_045512.2      | China     | 45.38 | 39        | MT499219.1       | Tunisia  | 45.36 |
| 10    | MT799974.1       | India     | 45.37 | 40        | MT499220.1       | Tunisia  | 45.37 |
| 11    | MT607244.1       | India     | 45.37 | 41        | MT470100.1       | France   | 45.37 |
| 12    | MT635856.1       | India     | 45.37 | 42        | MT470101.1       | France   | 45.37 |
| 13    | MT457402.1       | India     | 45.36 | 43        | MT470102.1       | France   | 45.37 |
| 14    | MT012098.1       | India     | 45.39 | 44        | MT709104.1       | France   | 46.26 |
| 15    | MT509506.1       | India     | 45.35 | 45        | MT709105.1       | France   | 45.38 |
| 16    | MT007544.1       | Australia | 45.41 | 46        | MT470106.1       | France   | 45.36 |
| 17    | MT745608.1       | Australia | 45.36 | 47        | MT066156.1       | Italy    | 50.98 |
| 18    | MT745611.1       | Australia | 45.38 | 48        | MT525950.1       | Italy    | 45.38 |
| 19    | MT745629.1       | Australia | 45.36 | 49        | MT622321.1       | Italy    | 45.37 |
| 20    | MT745630.1       | Australia | 47.37 | 50        | MT682732.1       | Italy    | 45.39 |
| 21    | MT126808.1       | Brazil    | 45.39 | 51        | MT748758.1       | Italy    | 45.39 |
| 22    | MT835026.1       | Brazil    | 45.38 | 52        | MT890669.1       | Italy    | 45.38 |
| 23    | MT835027.1       | Brazil    | 45.38 | 53        | MT635445.1       | Russia   | 45.38 |
| 24    | MT835383.1       | Brazil    | 45.38 | 54        | MT637143.1       | Russia   | 45.37 |
| 25    | MT844030.1       | Brazil    | 45.38 | 55        | MT890462.1       | Russia   | 45.38 |
| 26    | MT163719.1       | USA       | 45.37 | 56        | MT198652.2       | Spain    | 46.43 |
| 27    | MT106054.1       | USA       | 45.38 | 57        | MT233519.1       | Spain    | 46.1  |
| 28    | MT325622.1       | USA       | 45.36 | 58        | MT233522.1       | Spain    | 52.06 |
| 29    | MT325627.1       | USA       | 45.37 | 59        | MT233523.1       | Spain    | 45.36 |
| 30    | MT325598.1       | USA       | 45.37 | 60        | MT292569.1       | Spain    | 45.38 |
| Mean  |                  |           |       | 45.80     |                  |          |       |
| Std   |                  |           |       | 1.27      |                  |          |       |
| Range |                  |           |       | Max=52.06 |                  | Min=45.1 |       |

**Supplementary Table S2:** *ENC and GC3 values of all the sixty strains of SARS-CoV-2 viruses from around the globe with their mean and standard deviation.*

| S. No | Accession Number | Country   | ENC   | GC3s | ENC exp |
|-------|------------------|-----------|-------|------|---------|
| 1     | MT500122.1       | Pakistan  | 45.37 | 0.26 | 49.32   |
| 2     | MT879619.1       | Pakistan  | 45.33 | 0.26 | 49.25   |
| 3     | MT262993.1       | Pakistan  | 45.38 | 0.26 | 49.32   |
| 4     | MT240479.1       | Pakistan  | 45.36 | 0.26 | 49.32   |
| 5     | MT135042.1       | China     | 45.38 | 0.26 | 49.32   |
| 6     | MT135043.1       | China     | 45.37 | 0.26 | 49.32   |
| 7     | MT121215.1       | China     | 45.17 | 0.26 | 49.10   |
| 8     | MN996529.1       | China     | 45.36 | 0.26 | 49.32   |
| 9     | NC_045512.2      | China     | 45.38 | 0.26 | 49.32   |
| 10    | MT799974.1       | India     | 45.37 | 0.26 | 49.32   |
| 11    | MT607244.1       | India     | 45.37 | 0.26 | 49.32   |
| 12    | MT635856.1       | India     | 45.37 | 0.26 | 49.32   |
| 13    | MT457402.1       | India     | 45.36 | 0.26 | 49.32   |
| 14    | MT012098.1       | India     | 45.39 | 0.26 | 49.32   |
| 15    | MT509506.1       | India     | 45.35 | 0.26 | 49.25   |
| 16    | MT007544.1       | Australia | 45.41 | 0.26 | 49.32   |
| 17    | MT745608.1       | Australia | 45.36 | 0.26 | 49.25   |
| 18    | MT745611.1       | Australia | 45.38 | 0.26 | 49.32   |
| 19    | MT745629.1       | Australia | 45.36 | 0.26 | 49.25   |
| 20    | MT745630.1       | Australia | 47.37 | 0.30 | 52.02   |
| 21    | MT126808.1       | Brazil    | 45.39 | 0.26 | 49.32   |
| 22    | MT835026.1       | Brazil    | 45.38 | 0.26 | 49.32   |
| 23    | MT835027.1       | Brazil    | 45.38 | 0.26 | 49.32   |
| 24    | MT835383.1       | Brazil    | 45.38 | 0.26 | 49.32   |
| 25    | MT844030.1       | Brazil    | 45.38 | 0.26 | 49.32   |
| 26    | MT163719.1       | USA       | 45.37 | 0.26 | 49.32   |
| 27    | MT106054.1       | USA       | 45.38 | 0.26 | 49.32   |
| 28    | MT325622.1       | USA       | 45.36 | 0.26 | 49.32   |
| 29    | MT325627.1       | USA       | 45.37 | 0.26 | 49.32   |
| 30    | MT325598.1       | USA       | 45.37 | 0.26 | 49.32   |
| 31    | MT890210.1       | Ghana     | 45.73 | 0.27 | 49.85   |
| 32    | MT890211.1       | Ghana     | 47.77 | 0.29 | 51.74   |
| 33    | MT890230.1       | Ghana     | 47.41 | 0.30 | 51.95   |
| 34    | MT890235.1       | Ghana     | 45.74 | 0.27 | 49.77   |
| 35    | MT890236.1       | Ghana     | 49.1  | 0.32 | 53.93   |
| 36    | MT499215.1       | Tunisia   | 45.37 | 0.26 | 49.32   |
| 37    | MT499217.1       | Tunisia   | 45.35 | 0.26 | 49.25   |
| 38    | MT499218.1       | Tunisia   | 45.37 | 0.26 | 49.32   |
| 39    | MT499219.1       | Tunisia   | 45.36 | 0.26 | 49.25   |
| 40    | MT499220.1       | Tunisia   | 45.37 | 0.26 | 49.32   |
| 41    | MT470100.1       | France    | 45.37 | 0.26 | 49.32   |

|      |            |        |       |      |       |
|------|------------|--------|-------|------|-------|
| 42   | MT470101.1 | France | 45.37 | 0.26 | 49.32 |
| 43   | MT470102.1 | France | 45.37 | 0.26 | 49.32 |
| 44   | MT709104.1 | France | 46.26 | 0.27 | 50.43 |
| 45   | MT709105.1 | France | 45.38 | 0.26 | 49.32 |
| 46   | MT470106.1 | France | 45.36 | 0.26 | 49.32 |
| 47   | MT066156.1 | Italy  | 50.98 | 0.36 | 56.31 |
| 48   | MT525950.1 | Italy  | 45.38 | 0.26 | 49.32 |
| 49   | MT622321.1 | Italy  | 45.37 | 0.26 | 49.32 |
| 50   | MT682732.1 | Italy  | 45.39 | 0.26 | 49.32 |
| 51   | MT748758.1 | Italy  | 45.39 | 0.26 | 49.32 |
| 52   | MT890669.1 | Italy  | 45.38 | 0.26 | 49.32 |
| 53   | MT635445.1 | Russia | 45.38 | 0.26 | 49.32 |
| 54   | MT637143.1 | Russia | 45.37 | 0.26 | 49.32 |
| 55   | MT890462.1 | Russia | 45.38 | 0.26 | 49.32 |
| 56   | MT198652.2 | Spain  | 46.43 | 0.28 | 50.51 |
| 57   | MT233519.1 | Spain  | 46.1  | 0.27 | 49.92 |
| 58   | MT233522.1 | Spain  | 52.06 | 0.36 | 56.09 |
| 59   | MT233523.1 | Spain  | 45.36 | 0.26 | 49.25 |
| 60   | MT292569.1 | Spain  | 45.38 | 0.26 | 49.32 |
| Mean |            |        | 45.80 | 0.27 | 49.81 |
| Std  |            |        | 1.27  | 0.02 | 1.46  |

**Supplementary Table S3:** Neutrality plot (GC3 and GC12) value comparison of all the sixty strains of SARS-CoV-2

| S. No | Accession Number | Country  | GC3s | GC12  | S. No | Accession Number | Country | GC3s | GC12  |
|-------|------------------|----------|------|-------|-------|------------------|---------|------|-------|
| 1     | MT500122.1       | Pakistan | 0.26 | 42.73 | 31    | MT890210.1       | Ghana   | 0.27 | 42.33 |
| 2     | MT879619.1       | Pakistan | 0.26 | 42.76 | 32    | MT890211.1       | Ghana   | 0.29 | 40.82 |
| 3     | MT262993.1       | Pakistan | 0.26 | 42.79 | 33    | MT890230.1       | Ghana   | 0.30 | 40.89 |

|      |             |           |      |       |    |            |         |      |       |
|------|-------------|-----------|------|-------|----|------------|---------|------|-------|
| 4    | MT240479.1  | Pakistan  | 0.26 | 42.76 | 34 | MT890235.1 | Ghana   | 0.27 | 42.41 |
| 5    | MT135042.1  | China     | 0.26 | 42.86 | 35 | MT890236.1 | Ghana   | 0.32 | 39.61 |
| 6    | MT135043.1  | China     | 0.26 | 42.84 | 36 | MT499215.1 | Tunisia | 0.26 | 42.77 |
| 7    | MT121215.1  | China     | 0.26 | 43.14 | 37 | MT499217.1 | Tunisia | 0.26 | 42.76 |
| 8    | MN996529.1  | China     | 0.26 | 42.82 | 38 | MT499218.1 | Tunisia | 0.26 | 42.73 |
| 9    | NC_045512.2 | China     | 0.26 | 62.11 | 39 | MT499219.1 | Tunisia | 0.26 | 42.76 |
| 10   | MT799974.1  | India     | 0.26 | 42.73 | 40 | MT499220.1 | Tunisia | 0.26 | 42.76 |
| 11   | MT607244.1  | India     | 0.26 | 42.75 | 41 | MT470100.1 | France  | 0.26 | 42.77 |
| 12   | MT635856.1  | India     | 0.26 | 42.78 | 42 | MT470101.1 | France  | 0.26 | 42.75 |
| 13   | MT457402.1  | India     | 0.26 | 38.88 | 43 | MT470102.1 | France  | 0.26 | 42.76 |
| 14   | MT012098.1  | India     | 0.26 | 42.85 | 44 | MT709104.1 | France  | 0.27 | 41.90 |
| 15   | MT509506.1  | India     | 0.26 | 35.58 | 45 | MT709105.1 | France  | 0.26 | 42.76 |
| 16   | MT007544.1  | Australia | 0.26 | 42.73 | 46 | MT470106.1 | France  | 0.26 | 42.76 |
| 17   | MT745608.1  | Australia | 0.26 | 42.74 | 47 | MT066156.1 | Italy   | 0.36 | 37.28 |
| 18   | MT745611.1  | Australia | 0.26 | 66.19 | 48 | MT525950.1 | Italy   | 0.26 | 42.75 |
| 19   | MT745629.1  | Australia | 0.26 | 42.74 | 49 | MT622321.1 | Italy   | 0.26 | 42.75 |
| 20   | MT745630.1  | Australia | 0.30 | 39.95 | 50 | MT682732.1 | Italy   | 0.26 | 42.77 |
| 21   | MT126808.1  | Brazil    | 0.26 | 42.81 | 51 | MT748758.1 | Italy   | 0.26 | 42.79 |
| 22   | MT835026.1  | Brazil    | 0.26 | 42.78 | 52 | MT890669.1 | Italy   | 0.26 | 42.75 |
| 23   | MT835027.1  | Brazil    | 0.26 | 42.77 | 53 | MT635445.1 | Russia  | 0.26 | 42.78 |
| 24   | MT835383.1  | Brazil    | 0.26 | 42.78 | 54 | MT637143.1 | Russia  | 0.26 | 42.74 |
| 25   | MT844030.1  | Brazil    | 0.26 | 42.76 | 55 | MT890462.1 | Russia  | 0.26 | 42.75 |
| 26   | MT163719.1  | USA       | 0.26 | 42.79 | 56 | MT198652.2 | Spain   | 0.28 | 41.87 |
| 27   | MT106054.1  | USA       | 0.26 | 42.82 | 57 | MT233519.1 | Spain   | 0.27 | 42.42 |
| 28   | MT325622.1  | USA       | 0.26 | 42.73 | 58 | MT233522.1 | Spain   | 0.36 | 37.30 |
| 29   | MT325627.1  | USA       | 0.26 | 42.78 | 59 | MT233523.1 | Spain   | 0.26 | 42.84 |
| 30   | MT325598.1  | USA       | 0.26 | 42.72 | 60 | MT292569.1 | Spain   | 0.26 | 42.77 |
| Mean |             |           |      |       |    |            |         | 0.27 | 42.91 |
| Std  |             |           |      |       |    |            |         | 0.02 | 4.27  |

**Supplementary Table S4:** CAI values of sixty strains of SARS-CoV-2 with host humans.

| S. No | Accession Number | Country  | CAI Homo-sapiens | S. No | Accession Number | Country | CAI Homo-sapiens |
|-------|------------------|----------|------------------|-------|------------------|---------|------------------|
| 1     | MT500122.1       | Pakistan | 0.69             | 32    | MT890211.1       | Ghana   | 0.71             |
| 2     | MT879619.1       | Pakistan | 0.69             | 33    | MT890230.1       | Ghana   | 0.70             |
| 3     | MT262993.1       | Pakistan | 0.69             | 34    | MT890235.1       | Ghana   | 0.69             |
| 4     | MT240479.1       | Pakistan | 0.69             | 35    | MT890236.1       | Ghana   | 0.71             |
| 5     | MT135042.1       | China    | 0.69             | 36    | MT499215.1       | Tunisia | 0.69             |
| 6     | MT135043.1       | China    | 0.69             | 37    | MT499217.1       | Tunisia | 0.69             |

|                    |             |           |      |            |            |         |      |
|--------------------|-------------|-----------|------|------------|------------|---------|------|
| 7                  | MT121215.1  | China     | 0.69 | 38         | MT499218.1 | Tunisia | 0.69 |
| 8                  | MN996529.1  | China     | 0.69 | 39         | MT499219.1 | Tunisia | 0.69 |
| 9                  | NC_045512.2 | China     | 0.69 | 40         | MT499220.1 | Tunisia | 0.69 |
| 10                 | MT799974.1  | India     | 0.69 | 41         | MT470100.1 | France  | 0.70 |
| 11                 | MT607244.1  | India     | 0.69 | 42         | MT470101.1 | France  | 0.70 |
| 12                 | MT635856.1  | India     | 0.69 | 43         | MT470102.1 | France  | 0.70 |
| 13                 | MT457402.1  | India     | 0.69 | 44         | MT709104.1 | France  | 0.70 |
| 14                 | MT012098.1  | India     | 0.69 | 45         | MT709105.1 | France  | 0.70 |
| 15                 | MT509506.1  | India     | 0.69 | 46         | MT470106.1 | France  | 0.70 |
| 16                 | MT007544.1  | Australia | 0.69 | 47         | MT066156.1 | Italy   | 0.69 |
| 17                 | MT745608.1  | Australia | 0.69 | 48         | MT525950.1 | Italy   | 0.69 |
| 18                 | MT745611.1  | Australia | 0.69 | 49         | MT622321.1 | Italy   | 0.69 |
| 19                 | MT745629.1  | Australia | 0.69 | 50         | MT682732.1 | Italy   | 0.69 |
| 20                 | MT745630.1  | Australia | 0.70 | 51         | MT748758.1 | Italy   | 0.69 |
| 21                 | MT126808.1  | Brazil    | 0.69 | 52         | MT890669.1 | Italy   | 0.69 |
| 22                 | MT835026.1  | Brazil    | 0.69 | 53         | MT635445.1 | Russia  | 0.69 |
| 23                 | MT835027.1  | Brazil    | 0.69 | 54         | MT637143.1 | Russia  | 0.69 |
| 24                 | MT835383.1  | Brazil    | 0.69 | 55         | MT890462.1 | Russia  | 0.69 |
| 25                 | MT844030.1  | Brazil    | 0.69 | 56         | MT198652.2 | Spain   | 0.73 |
| 26                 | MT163719.1  | USA       | 0.69 | 57         | MT233519.1 | Spain   | 0.73 |
| 27                 | MT106054.1  | USA       | 0.69 | 58         | MT233522.1 | Spain   | 0.73 |
| 28                 | MT325622.1  | USA       | 0.69 | 59         | MT233523.1 | Spain   | 0.73 |
| 29                 | MT325627.1  | USA       | 0.69 | 60         | MT292569.1 | Spain   | 0.73 |
| Standard deviation |             |           |      | 0.01055549 |            |         |      |
| Mean               |             |           |      | 0.70       |            |         |      |

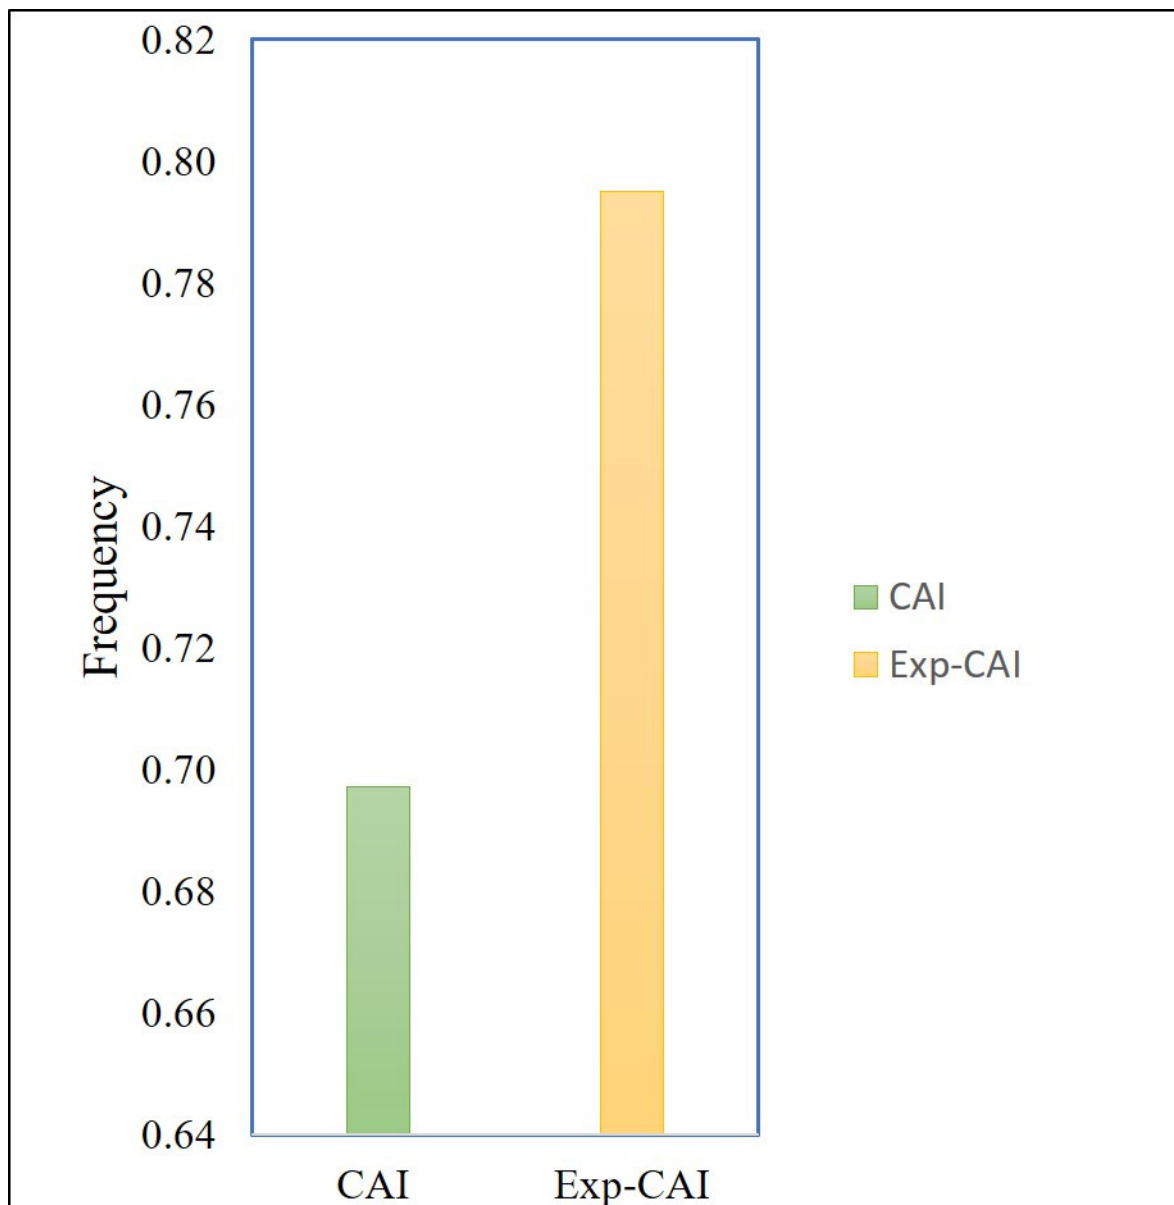

**Figure S1:** Mean CAI value and Expected CAI value of SARS-CoV-2 strains against its host *Homo sapiens*.
